# Supplementary material for: YY1 regulation by miR-124-3p promotes Th17 cell pathogenicity through interaction with T-bet in rheumatoid arthritis
Source: JCI journal article supplement (doi:10.1172/jci.insight.149985), 2021-11-21
Supplement: sd1 [file 1]

## Supplementary Table 1

Participants' information and clinical characteristics.

| Characteristics              | RA                 | OA              | HD               |
|------------------------------|--------------------|-----------------|------------------|
| Number                       | 82                 | 36              | 64               |
| Age (years) <sup>a</sup>     | 55(45.25,62.25)    | 52.5(35, 62.25) | 50(45.75, 52.75) |
| Sex (M/F)                    | 20/62              | 10/26           | 18/46            |
| Anti-CCP(IU/ml) <sup>a</sup> | 130.6(79.65,174)   | /               | /                |
| RF((IU/ml) <sup>b</sup>      | 123.5(48.63,383.3) | /               | /                |
| CRP(mm/h) <sup>b</sup>       | 18.18±21.03        | /               | /                |
| ESR(mg/ml) <sup>b</sup>      | 39.28±24.3         | /               | /                |

<sup>a</sup> Expressed as the median (25th to 75th percentile).

<sup>b</sup> Expressed as the means ± SD (standard deviation).

Abbreviations: RA, rheumatoid arthritis; OA, osteoarthritis; HD, healthy donors; anti-CCP, anti-cyclic citrullinated peptide antibody; RF, rheumatoid factor; CRP, C-reactive protein; ESR, erythrocyte sedimentation rate.

## Supplementary Table 2

Primers used for qPCR.

| Species      | Gene Name      | Sequence (5'-3')                                                                                                    |
|--------------|----------------|---------------------------------------------------------------------------------------------------------------------|
| Homo sapiens | YY1            | Fw: AAAACGACACCAACTGGTTCATAC<br>Rv: AAGTCCAGTGAAAAGCGTTTCC                                                          |
|              | T-bet          | Fw: AACCCAGTTCATTGCCGTGAC<br>Rv: ATGGACTCAAAGTTCTCCCGGAA                                                            |
|              | IL-17A         | Fw: GCTGGAGAAGATACTGGTGTC<br>Rv: TAATGAGTTTAGTCCGAAATGAGG                                                           |
|              | IL-22          | Fw: AAATAACAATTAGATGCCCA<br>Rv: TAAACAAAAGTGGCATTGGT                                                                |
|              | Foxp3          | Fw: CAAGTCCACAACATGCGACCC<br>Rv: TCCAGCTCATCCACGGTCCAC                                                              |
|              | ROR $\gamma$ t | Fw: GGCACCCTACCCTTTACCTG<br>Rv: TCTTGGCCTTCATTGTACCCT                                                               |
|              | STAT3          | Fw: TCTGCCTGTTTCTGTAAGCAA<br>Rv: AAAGGCTATGCTGATACAGT                                                               |
|              | Runx1          | Fw: TTCTGAAAAGCACCATTAGCC<br>Rv: AAACAAATGTATACGCTACGG                                                              |
|              | GAPDH          | Fw: CACATGGCCTCCAAGGAGTAA<br>Rv: TGAGGGTCTCTCTCTTCTCTTGT                                                            |
|              | miR-124-3p     | Fw: CGTAAGGCACGCGGTGAA<br>Rv: AGTGCAGGGTCCGAGGTATT<br>Rt:GTCGTATCCAGTGCAGGGTCCGAGGTATTTCGCACTGGATA<br>CGACTTGGCA    |
|              | miR-218-5p     | Fw: GCGCGTTGTGCTTGATCTAA<br>Rv: AGTGCAGGGTCCGAGGTATT<br>Rt:GTCGTATCCAGTGCAGGGTCCGAGGTATTTCGCACTGGATA<br>CGACACATGG  |
|              | let-7-5p       | Fw: GCGCGTGAGGTAGTAGGTTGT<br>Rv: AGTGCAGGGTCCGAGGTATT<br>Rt:GTCGTATCCAGTGCAGGGTCCGAGGTATTTCGCACTGGATA<br>CGACAACCAC |
|              | U6             | Fw: AACGCTTCACGAATTTGCGT<br>Rv: CTCGCTTCGGCAGCACA<br>Rt: CTCGCTTCGGCAGCACA                                          |

Abbreviations: Fw, Forward primer; Rv: Reverse primer; Rt: Reverse transcription primer.

### Supplementary Table 3

Primers used for plasmids cloning.

| Species      | Primer Designation        | Sequence (5'-3')                                                                                                                                     |                                                                                                                                                    |
|--------------|---------------------------|------------------------------------------------------------------------------------------------------------------------------------------------------|----------------------------------------------------------------------------------------------------------------------------------------------------|
| Homo sapiens | LV-YY1-shRNA              | Fw: GATCC-GACGACGACTACATTGAACAA-TTCAAGAGA-TTGTTCAATGTAGTCGTCGTC-TTTTTTG<br>Rv: AATTCAAAAAAG-CCTCCTGATTATTCAGAATAT-TCTCTTGAA-ATATTCTGAATAATCAGG-AGGCG |                                                                                                                                                    |
|              | WT-T-bet promoter region  | Fw: CGGGGTACCGGAGAAAGAGGGCAACCCG<br>Rv: CCGCTCGAGCTGTCACTAGAGTCGCAGCG                                                                                |                                                                                                                                                    |
|              | MUT-T-bet promoter region | Fw: CACTTGGATTGCTTCGGAAGGCTTCTGTAGGAG<br>Rv: TCCGAAGCAATCCAAGTGGGACTCGCTGGGCAT                                                                       |                                                                                                                                                    |
|              | YY1-let7-WT               | AACAGGCATCCCGAGTTCAGGAACTACCTCAGAACA<br>CCCCAGGCCAGGTTGGTCATAGGCT                                                                                    |                                                                                                                                                    |
|              | YY1-miR-124-WT            | CCCTGTGGCTCTGTGGAATTTGAAGTGCCTTTTGTGA<br>ATCATGAATGAAACATTTAACTT                                                                                     |                                                                                                                                                    |
|              | YY1-miR-218-WT            | GAATATGGCAGAACAAGATCTGTAAGCACAGTCTTAT<br>TTTCTTTTGTGTCCAGAATACT                                                                                      |                                                                                                                                                    |
|              | YY1-miR-124-MUT           | CCCTGTGGCTCTGTGGAATTTGAACACGGAATTGTG<br>AATCATGAATGAAACATTTAACTT                                                                                     |                                                                                                                                                    |
|              | let-7-5p mimics           | UGAGGUAGGAGGUUGUAUAGUU                                                                                                                               |                                                                                                                                                    |
|              | miR-124-3p mimics         | UAAGGCACGCGGUGAAUGCCAA                                                                                                                               |                                                                                                                                                    |
|              | miR-218-5p mimics         | UUGUGCUUGAUCUAACCAUGU                                                                                                                                |                                                                                                                                                    |
|              | let-7-5p inhibitor        | AACUAUACAACCUCCUACCUCA                                                                                                                               |                                                                                                                                                    |
|              | miR-124-3p inhibitor      | UUGGCAUUCACCGCGUGCCUUA                                                                                                                               |                                                                                                                                                    |
|              | miR-218-5p inhibitor      | ACAUGGUUAGAUCAAGCACAA                                                                                                                                |                                                                                                                                                    |
|              | NC mimics                 | UUCUCCGAACGUGUCACGUTT                                                                                                                                |                                                                                                                                                    |
|              | NC inhibitor              | UUGUACUACACAAAAGUACUG                                                                                                                                |                                                                                                                                                    |
|              | Mus musculus              | LV-YY1-shRNA907                                                                                                                                      | Fw: GATCC-GGATACCTGGCATTGACCTCT-TTCAAGAGA-AGAGGTCAATGCCAGGTATCC-TTTTTTG<br>Rv: AATTCAAAAAAG-GATACCTGGCATTGACCTCT-TCTCTTGAA-AGAGGTCAATGCCAGGTATC-CG |
|              |                           | LV-YY1-shRNA1009                                                                                                                                     | Fw: GATCC-GCCCTCATAAAGGCTGCACAA-TTCAAGAGA-TTGTGCAGCCTTTATGAGGGC-TTTTTTG<br>Rv: AATTCAAAAAAG-CCCTCATAAAGGCTGCACAA-TCTCTTGAA-TTGTGCAGCCTTTATGAGGG-CG |

Abbreviations: Fw, forward primer; Rv: reverse primer; WT, wild-type; MUT, mutant; LV, lentivirus; shRNA, short hairpin RNA; NC, normal control.

## Supplementary Table 4

Primers used for ChIP PCR.

| Primer | Sequence (5'-3')                                         | Product Size(bp) | Position on T-bet Gene Locus |
|--------|----------------------------------------------------------|------------------|------------------------------|
| P1     | Fw: GGCAGAAACTTCCCTGTTCCCT<br>Rv: CTGGTACTGTCATGTATCCGGT | 98               | -1821~-1724                  |
| P2     | Fw: AAATTATATATTTGTGCATGTGT<br>Rv: GTGGAATTTGGGGTGATTTA  | 127              | -1321~-1195                  |
| P3     | Fw: CACCCTCTCATGTAAGGCTTG<br>Rv: GGTTGACTTTCAGGCAAGGAA   | 100              | -879~-780                    |
| P4     | Fw: CTTCTAGTGTGCCCGTGCTC<br>Rv: GAGACTTCAAAGCTGGGCTGA    | 126              | -405~-280                    |

Abbreviations: Fw, forward primer; Rv: reverse primer.

## Supplementary Figure 1

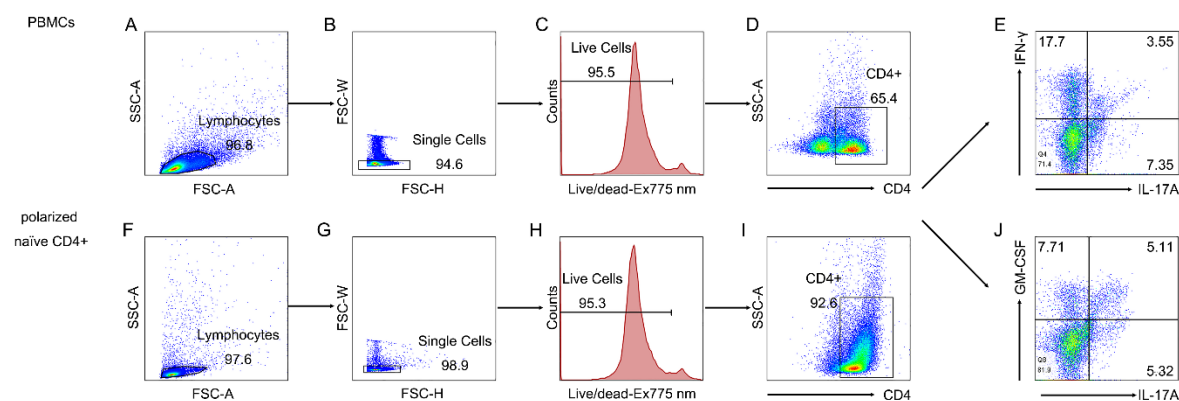

**Supplementary Figure 1. Representative scheme showing the flow-cytometry gating strategy used for the analysis of CD4<sup>+</sup>IL17A<sup>+</sup>IFN- $\gamma$ <sup>+</sup> cells or CD4<sup>+</sup>IL17A<sup>+</sup>GM-CSF<sup>+</sup> cells.** The proportions of CD4<sup>+</sup>IL17A<sup>+</sup>IFN- $\gamma$ <sup>+</sup> cells or CD4<sup>+</sup>IL17A<sup>+</sup>GM-CSF<sup>+</sup> cells were determined from PBMCs or polarized naïve CD4<sup>+</sup> cells. Cells were gated by FSC-A/SSC-A (A and F) to exclude debris and then by FSC-H/FSC-W (B and D) to exclude cell doublets. Next, Dead cells were excluded by live/dead staining (C and H) and CD4<sup>+</sup> cells (CD4<sup>+</sup>/SSC-A) were further gated (D and I). Lastly, cells to be analysed were gated by IL-17A and IFN- $\gamma$ /GM-CSF (E and J) to determine the cell proportions.

## Supplementary Figure 2

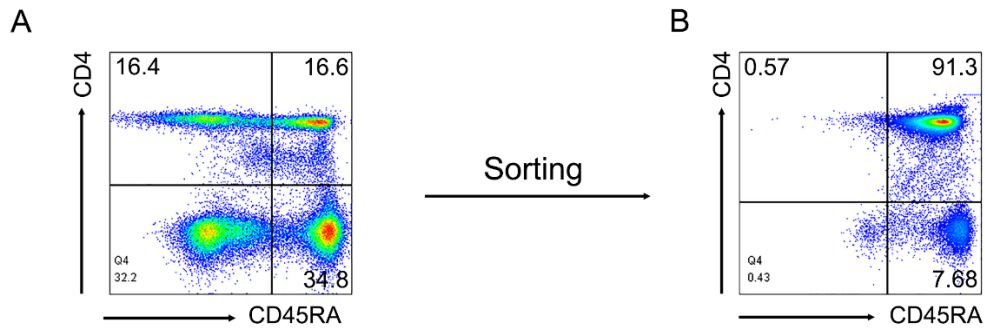

**Supplementary Figure 2. The sorting efficiency of CD4<sup>+</sup>CD45RA<sup>+</sup> cells from PBMCs.** Human naïve CD4<sup>+</sup> T cells from PBMCs (A) were purified following manufacturer's instruction. Purity check was performed after sorting and sorted fractions with  $\geq 90\%$  purity (B) were used for further experiments.
